# Supplementary material for: SeMPI: a genome-based secondary metabolite prediction and identification web server
Source: PubMed Central journal article supplement — Nucleic Acids Res. 2017 Apr 27;45(Web Server issue):W64–71. doi: 10.1093/nar/gkx289 (PMC5570227; doi:10.1093/nar/gkx289), 2017-04-27
Supplement: gkx289_Supp.pdf [file gkx289_Supp.pdf]

## Supplementary Material

S1

| Domains | Amount |
|---------|--------|
| KS      | 394    |
| AT      | 539    |
| DH      | 261    |
| ER      | 87     |
| KR      | 457    |
| ACP     | 609    |
| TE      | 29     |

Table S1. Number of experimentally characterized domains retrieved from the DoBISCUIT database (release version 2014-03-10).

S2

$$\max_s \left( \sum_{i=1}^{as} \frac{AA_{i,s}}{AT_s} \right)$$

Formula S2. Position probability matrices to predict substrate specificity of AT domains

s = substrates: malonyl, methylmalonyl, ethylmalonyl, methoxymalonyl;

as = active site residues: Q643, L671, Y742, S744 and L795 of DEBS AT domain;

AT = AT domains;

AA = 20 natural amino acids: A, C, E, D, G, F, I, H, K, M, L, N, Q, P, S, R, T, W, V, Y.

S3

| Scores                                                                                                          | Evaluation                                                                                               | Points                                                             |
|-----------------------------------------------------------------------------------------------------------------|----------------------------------------------------------------------------------------------------------|--------------------------------------------------------------------|
| Length score                                                                                                    | Length of the molecule, based on the main chain                                                          | 1 point for each matching segment                                  |
|                                                                                                                 |                                                                                                          | -1 point for each not matching segment                             |
| Main bond score                                                                                                 | Bond type of each segment                                                                                | 1 point for each matching bond                                     |
|                                                                                                                 |                                                                                                          | -1 point for each not matching bond                                |
| Main atom score                                                                                                 | Atom type of each segment                                                                                | 1 point for each matching atom                                     |
|                                                                                                                 |                                                                                                          | -1 point for each not matching atom                                |
| Neighbor score                                                                                                  | Compares the neighbors for each segment, the type of neighbor is not evaluated in this score.            | +1 if a neighbor exists in both segments                           |
|                                                                                                                 |                                                                                                          | +1 if a neighbor does not exist in either segment                  |
|                                                                                                                 |                                                                                                          | -1 if one neighbor exists in only one segment                      |
|                                                                                                                 |                                                                                                          | -2 if 2 neighbors exist in only one segment                        |
|                                                                                                                 |                                                                                                          | 0 if one segment has 2 neighbors and the other only 1              |
| For simplification purposes the following three scores are combined as 'side chain score' in the server output. |                                                                                                          |                                                                    |
| Side score                                                                                                      | Compares the neighbors for each segment, very strict both atom and bond must match. Can only match ones. | +1 if matched                                                      |
| 2 <sup>nd</sup> neighbor score                                                                                  | Compares the next neighbor, the type of neighbor is not evaluated in this score.                         | +1 if both do not have another neighbor                            |
|                                                                                                                 |                                                                                                          | -1 if the prediction has another neighbor but the comparison not   |
|                                                                                                                 |                                                                                                          | -1 if the comparison has another neighbor but the prediction not   |
|                                                                                                                 |                                                                                                          | -2 if the prediction has 2 other neighbors but the comparison not  |
|                                                                                                                 |                                                                                                          | -3 if the prediction has 3 other neighbors but the comparison not  |
|                                                                                                                 |                                                                                                          | +1 if both have one more neighbor                                  |
|                                                                                                                 |                                                                                                          | 0 if the prediction has 1 and the comparison has 2 more neighbors  |
|                                                                                                                 |                                                                                                          | -1 if the prediction has 1 and the comparison has 3 more neighbors |

|                            |                                                                                                          |               |
|----------------------------|----------------------------------------------------------------------------------------------------------|---------------|
| 2 <sup>nd</sup> side score | Compares the neighbors for each segment, very strict both atom and bond must match. Can only match ones. | +1 if matched |
|----------------------------|----------------------------------------------------------------------------------------------------------|---------------|

Table S3. Explanation of the scoring system. The paths/matrices are walked through and compared to each other. The main focus of this point system is the separation between good and bad matches for a given prediction. The last three scores are combined in the server output, the resulting 'side chain score' can be interpreted as a general evaluation of the given side chain.
